# Supplementary material for: Exploiting subtractive genomics to identify novel drug targets and new immunogenic candidates against Bordetella pertussis: an in silico study
Source: Front Bioinform. 2025 May 13;5:1570054. doi: 10.3389/fbinf.2025.1570054 (PMC12106433; doi:10.3389/fbinf.2025.1570054)
Supplement: Supplementary file 5 [file DataSheet8.xlsx]

## Sheet: Sheet1
No.	Protein	Antigenicity	B-cell epitopes	MHC	prevalence
1	fimB	0.6433	0.008	1.504	100
2	NZ_CP086368_CDS_LMF30_RS00840	0.6551	0.183	1.19	100
3	NZ_CP086368_CDS_LMF30_RS01660	0.7084	0.048	1.018	100
4	NZ_CP086368_CDS_LMF30_RS02925	0.6853	0.086	0.903	100
5	NZ_CP086368_CDS_ptxA	0.5463	0.141	0.981	99.67
6	NZ_CP086368_CDS_LMF30_RS03215	0.8942	0.08	0.962	100
7	NZ_CP086368_CDS_LMF30_RS03675	0.5855	0.108	1.278	100
8	NZ_CP086368_CDS_brkA	0.8504	0.348	1.54	100
9	NZ_CP086368_CDS_LMF30_RS04990	0.6399	0.178	1.782	100
10	NZ_CP086368_CDS_LMF30_RS05180	0.5975	0.044	1.349	99.67
11	NZ_CP086368_CDS_tolA	0.9508	0.354	2.021	100
12	NZ_CP086368_CDS_pal	0.7531	0.139	1.357	100
13	NZ_CP086368_CDS_LMF30_RS05365	0.5624	0.112	1.581	100
14	NZ_CP086368_CDS_LMF30_RS05390	0.8135	0.085	1.615	99.67
15	NZ_CP086368_CDS_LMF30_RS05475	0.6218	0.097	1.361	100
16	NZ_CP086368_CDS_cyaE	0.632	0.05	1.246	100
17	NZ_CP086368_CDS_LMF30_RS05675	0.6141	0.055	1.45	99.67
18	NZ_CP086368_CDS_LMF30_RS06000	0.6039	0.2	1.66	100
19	NZ_CP086368_CDS_LMF30_RS06080	0.6377	0.11	1.613	100
20	NZ_CP086368_CDS_LMF30_RS06085	0.6575	0.138	1.554	100
21	NZ_CP086368_CDS_LMF30_RS06190	0.6865	0.094	1.618	100
22	NZ_CP086368_CDS_LMF30_RS06735	0.564	0.049	1.427	100
23	NZ_CP086368_CDS_LMF30_RS06785	0.6965	0.319	1.296	100
24	NZ_CP086368_CDS_prn	0.7505	0.194	1.473	100
25	NZ_CP086368_CDS_LMF30_RS07435	0.8217	0.28	1.638	100
26	NZ_CP086368_CDS_LMF30_RS07530	0.6577	0.117	1.607	2.83
27	NZ_CP086368_CDS_LMF30_RS07790	0.5169	0.133	1.943	100
28	NZ_CP086368_CDS_tcfA	0.9705	0.378	2.296	100
29	NZ_CP086368_CDS_LMF30_RS08585	0.8224	0.321	1.496	100
30	NZ_CP086368_CDS_flgB	0.6889	0.222	1.222	99.89
31	NZ_CP086368_CDS_LMF30_RS08735	0.5602	0.149	1.589	99.89
32	NZ_CP086368_CDS_LMF30_RS08740	0.654	0.147	1.748	99.89
33	NZ_CP086368_CDS_flgG	0.6809	0.157	1.463	99.89
34	NZ_CP086368_CDS_LMF30_RS08755	0.6527	0.24	1.052	99.89
35	NZ_CP086368_CDS_LMF30_RS08760	0.532	0.029	1.257	99.89
36	NZ_CP086368_CDS_flgL	0.6248	0.198	1.501	99.89
37	NZ_CP086368_CDS_fliM	0.5809	0.107	1.586	100
38	NZ_CP086368_CDS_fliL	0.5768	0.11	1.921	100
39	NZ_CP086368_CDS_LMF30_RS19935	0.7489	0.523	1.507	0 hit from BacMap
40	NZ_CP086368_CDS_fliE	0.5991	0.081	1.263	100
41	NZ_CP086368_CDS_fliD	0.7692	0.091	1.212	100
42	NZ_CP086368_CDS_LMF30_RS09700	0.5902	0.168	1.43	100
43	NZ_CP086368_CDS_LMF30_RS09730	0.7296	0.232	1.406	100
44	NZ_CP086368_CDS_sphB2	1.193	0.459	1.97	99.56
45	NZ_CP086368_CDS_LMF30_RS10475	0.7385	0.306	1.697	100
46	NZ_CP086368_CDS_phg	0.6091	0.184	1.538	100
47	NZ_CP086368_CDS_LMF30_RS11520	0.8856	0.175	2.026	99.78
48	NZ_CP086368_CDS_LMF30_RS12100	0.5373	0.114	1.501	100
49	NZ_CP086368_CDS_LMF30_RS12200	0.5032	0.236	1.545	100
50	NZ_CP086368_CDS_LMF30_RS12370	0.6389	0.061	1.619	7.86
51	NZ_CP086368_CDS_pgaA	0.5773	0.021	1.452	100
52	NZ_CP086368_CDS_fhaC	0.5986	0.113	1.452	100
53	NZ_CP086368_CDS_LMF30_RS12780	0.6417	0.098	1.898	100
54	NZ_CP086368_CDS_LMF30_RS12785	0.6353	0.068	1.545	100
55	NZ_CP086368_CDS_LMF30_RS12795	0.835	0.317	1.558	100
56	NZ_CP086368_CDS_bapA	0.7688	0.344	1.665	100
57	NZ_CP086368_CDS_bscC	0.6183	0.26	1.37	100
58	NZ_CP086368_CDS_bscJ	0.6362	0.025	1.675	100
59	NZ_CP086368_CDS_LMF30_RS13355	0.5728	0.06	1.19	100
60	NZ_CP086368_CDS_vag8	0.7973	0.303	1.5	100
61	NZ_CP086368_CDS_LMF30_RS13630	0.5118	0.129	1.875	100
62	NZ_CP086368_CDS_fauA	0.5225	0.104	1.399	100
63	NZ_CP086368_CDS_LMF30_RS14600	0.5033	0.208	1.489	100
64	NZ_CP086368_CDS_LMF30_RS14800	0.6965	0.166	1.593	100
65	NZ_CP086368_CDS_fimX	0.7227	0.283	1.472	100
66	NZ_CP086368_CDS_LMF30_RS16280	0.6788	0.2	1.563	100
67	NZ_CP086368_CDS_LMF30_RS16730	0.7061	0.215	1.629	99.89
68	NZ_CP086368_CDS_LMF30_RS16745	0.6063	0.144	1.404	99.89
69	NZ_CP086368_CDS_LMF30_RS16915	0.5011	0.129	1.305	100
70	NZ_CP086368_CDS_LMF30_RS17210	0.5254	0.051	1.554	100
71	NZ_CP086368_CDS_LMF30_RS17550	0.7347	0.155	1.586	100
72	NZ_CP086368_CDS_LMF30_RS18280	0.5567	0.147	1.838	100
73	NZ_CP086368_CDS_LMF30_RS18775	0.7096	0.128	1.763	99.23
74	NZ_CP086368_CDS_LMF30_RS18870	0.6507	0.11	1.415	7.86
75	NZ_CP086368_CDS_bopC	0.7764	0.06	1.448	100
76	NZ_CP086368_CDS_fliF	0.5806	0.179	1.489	100

## Sheet: Quartile
No.	Protein	Antigenicity	Ag Score	B-cell epitopes	B CELL SCORE	MHC	MHC Score	prevalence
4	NZ_CP086368_CDS_LMF30_RS02925	0.6853	2	0.086	1	0.903	1	100
6	NZ_CP086368_CDS_LMF30_RS03215	0.8942	3	0.08	1	0.962	1	100
5	NZ_CP086368_CDS_ptxA	0.5463	1	0.141	2	0.981	1	100
3	NZ_CP086368_CDS_LMF30_RS01660	0.7084	2	0.048	1	1.018	1	99.89
34	NZ_CP086368_CDS_LMF30_RS08755	0.6527	1	0.24	2	1.052	1	99.67
59	NZ_CP086368_CDS_LMF30_RS13355	0.5728	1	0.06	1	1.19	1	100
2	NZ_CP086368_CDS_LMF30_RS00840	0.6551	1	0.183	2	1.19	1	100
41	NZ_CP086368_CDS_fliD	0.7692	2	0.091	1	1.212	1	100
30	NZ_CP086368_CDS_flgB	0.6889	2	0.222	2	1.222	1	100
16	NZ_CP086368_CDS_cyaE	0.632	1	0.05	1	1.246	2	99.67
35	NZ_CP086368_CDS_LMF30_RS08760	0.532	1	0.029	1	1.257	2	100
40	NZ_CP086368_CDS_fliE	0.5991	1	0.081	1	1.263	2	100
7	NZ_CP086368_CDS_LMF30_RS03675	0.5855	1	0.108	1	1.278	2	7.86
23	NZ_CP086368_CDS_LMF30_RS06785	0.6965	2	0.319	3	1.296	2	100
69	NZ_CP086368_CDS_LMF30_RS16915	0.5011	1	0.129	1	1.305	2	100
10	NZ_CP086368_CDS_LMF30_RS05180	0.5975	1	0.044	1	1.349	2	100
12	NZ_CP086368_CDS_pal	0.7531	2	0.139	2	1.357	2	99.67
15	NZ_CP086368_CDS_LMF30_RS05475	0.6218	1	0.097	1	1.361	2	100
57	NZ_CP086368_CDS_bscC	0.6183	1	0.26	2	1.37	2	100
62	NZ_CP086368_CDS_fauA	0.5225	1	0.104	1	1.399	2	100
68	NZ_CP086368_CDS_LMF30_RS16745	0.6063	1	0.144	2	1.404	2	100
43	NZ_CP086368_CDS_LMF30_RS09730	0.7296	2	0.232	2	1.406	2	100
74	NZ_CP086368_CDS_LMF30_RS18870	0.6507	1	0.11	1	1.415	2	100
22	NZ_CP086368_CDS_LMF30_RS06735	0.564	1	0.049	1	1.427	2	100
42	NZ_CP086368_CDS_LMF30_RS09700	0.5902	1	0.168	2	1.43	2	100
75	NZ_CP086368_CDS_bopC	0.7764	2	0.06	1	1.448	2	100
17	NZ_CP086368_CDS_LMF30_RS05675	0.6141	1	0.055	1	1.45	2	100
51	NZ_CP086368_CDS_pgaA	0.5773	1	0.021	1	1.452	2	7.86
52	NZ_CP086368_CDS_fhaC	0.5986	1	0.113	1	1.452	2	100
33	NZ_CP086368_CDS_flgG	0.6809	2	0.157	2	1.463	2	100
65	NZ_CP086368_CDS_fimX	0.7227	2	0.283	3	1.472	2	100
24	NZ_CP086368_CDS_prn	0.7505	2	0.194	2	1.473	2	2.83
76	NZ_CP086368_CDS_fliF	0.5806	1	0.179	2	1.489	2	99.23
63	NZ_CP086368_CDS_LMF30_RS14600	0.5033	1	0.208	2	1.489	2	100
29	NZ_CP086368_CDS_LMF30_RS08585	0.8224	2	0.321	3	1.496	2	100
60	NZ_CP086368_CDS_vag8	0.7973	2	0.303	3	1.5	2	100
48	NZ_CP086368_CDS_LMF30_RS12100	0.5373	1	0.114	1	1.501	2	100
36	NZ_CP086368_CDS_flgL	0.6248	1	0.198	2	1.501	2	100
1	fimB	0.6433	1	0.008	1	1.504	2	99.67
39	NZ_CP086368_CDS_LMF30_RS19935	0.7489	2	0.523	4	1.507	2	99.89
46	NZ_CP086368_CDS_phg	0.6091	1	0.184	2	1.538	2	100
8	NZ_CP086368_CDS_brkA	0.8504	3	0.348	3	1.54	2	99.89
54	NZ_CP086368_CDS_LMF30_RS12785	0.6353	1	0.068	1	1.545	2	99.89
49	NZ_CP086368_CDS_LMF30_RS12200	0.5032	1	0.236	2	1.545	2	100
70	NZ_CP086368_CDS_LMF30_RS17210	0.5254	1	0.051	1	1.554	2	99.89
20	NZ_CP086368_CDS_LMF30_RS06085	0.6575	1	0.138	2	1.554	2	100
55	NZ_CP086368_CDS_LMF30_RS12795	0.835	2	0.317	3	1.558	2	100
66	NZ_CP086368_CDS_LMF30_RS16280	0.6788	2	0.2	2	1.563	2	99.78
13	NZ_CP086368_CDS_LMF30_RS05365	0.5624	1	0.112	1	1.581	2	100
37	NZ_CP086368_CDS_fliM	0.5809	1	0.107	1	1.586	2	100
71	NZ_CP086368_CDS_LMF30_RS17550	0.7347	2	0.155	2	1.586	2	100
31	NZ_CP086368_CDS_LMF30_RS08735	0.5602	1	0.149	2	1.589	2	100
64	NZ_CP086368_CDS_LMF30_RS14800	0.6965	2	0.166	2	1.593	2	100
26	NZ_CP086368_CDS_LMF30_RS07530	0.6577	1	0.117	1	1.607	3	99.89
19	NZ_CP086368_CDS_LMF30_RS06080	0.6377	1	0.11	1	1.613	3	100
14	NZ_CP086368_CDS_LMF30_RS05390	0.8135	2	0.085	1	1.615	3	100
21	NZ_CP086368_CDS_LMF30_RS06190	0.6865	2	0.094	1	1.618	3	100
50	NZ_CP086368_CDS_LMF30_RS12370	0.6389	1	0.061	1	1.619	3	99.89
67	NZ_CP086368_CDS_LMF30_RS16730	0.7061	2	0.215	2	1.629	3	99.89
25	NZ_CP086368_CDS_LMF30_RS07435	0.8217	2	0.28	3	1.638	3	100
18	NZ_CP086368_CDS_LMF30_RS06000	0.6039	1	0.2	2	1.66	3	100
56	NZ_CP086368_CDS_bapA	0.7688	2	0.344	3	1.665	3	99.89
58	NZ_CP086368_CDS_bscJ	0.6362	1	0.025	1	1.675	3	100
45	NZ_CP086368_CDS_LMF30_RS10475	0.7385	2	0.306	3	1.697	3	100
32	NZ_CP086368_CDS_LMF30_RS08740	0.654	1	0.147	2	1.748	3	100
73	NZ_CP086368_CDS_LMF30_RS18775	0.7096	2	0.128	1	1.763	3	100
9	NZ_CP086368_CDS_LMF30_RS04990	0.6399	1	0.178	2	1.782	3	100
72	NZ_CP086368_CDS_LMF30_RS18280	0.5567	1	0.147	2	1.838	3	100
61	NZ_CP086368_CDS_LMF30_RS13630	0.5118	1	0.129	1	1.875	3	100
53	NZ_CP086368_CDS_LMF30_RS12780	0.6417	1	0.098	1	1.898	3	100
38	NZ_CP086368_CDS_fliL	0.5768	1	0.11	1	1.921	3	100
27	NZ_CP086368_CDS_LMF30_RS07790	0.5169	1	0.133	1	1.943	3	100
44	NZ_CP086368_CDS_sphB2	1.193	4	0.459	4	1.97	4	100
11	NZ_CP086368_CDS_tolA	0.9508	3	0.354	3	2.021	4	100
47	NZ_CP086368_CDS_LMF30_RS11520	0.8856	3	0.175	2	2.026	4	99.56
28	NZ_CP086368_CDS_tcfA	0.9705	3	0.378	3	2.296	4	0 hit from BacMap

## Sheet: Sheet2
No.	Protein	Ag Score	B CELL SCORE	MHC Score	Total score	prevalence	EGGNOG5
44	NZ_CP086368_CDS_sphB2	4	4	4	12	100	Outer membrane autotransporter barrel domain
11	NZ_CP086368_CDS_tolA	3	3	4	10	100	Cell envelope biogenesis protein TolA
28	NZ_CP086368_CDS_tcfA	3	3	4	10	0 hit from BacMap	Outer membrane autotransporter
47	NZ_CP086368_CDS_LMF30_RS11520	3	2	4	9	99.56	Peptidase inhibitor I78 family
8	NZ_CP086368_CDS_brkA	3	3	2	8	99.89	Outer membrane autotransporter barrel
25	NZ_CP086368_CDS_LMF30_RS07435	2	3	3	8	100	Cell adhesion
39	NZ_CP086368_CDS_LMF30_RS19935	2	4	2	8	99.89	N/D
45	NZ_CP086368_CDS_LMF30_RS10475	2	3	3	8	100	Membrane proteins related to metalloendopeptidases
56	NZ_CP086368_CDS_bapA	2	3	3	8	99.89	Outer membrane autotransporter barrel domain
23	NZ_CP086368_CDS_LMF30_RS06785	2	3	2	7	100	Bacterial-type flagellum-dependent cell motility
29	NZ_CP086368_CDS_LMF30_RS08585	2	3	2	7	100	Outer membrane autotransporter
55	NZ_CP086368_CDS_LMF30_RS12795	2	3	2	7	100	Fimbrial protein
60	NZ_CP086368_CDS_vag8	2	3	2	7	100	Outer membrane autotransporter barrel
65	NZ_CP086368_CDS_fimX	2	3	2	7	100	Fimbrial protein
67	NZ_CP086368_CDS_LMF30_RS16730	2	2	3	7	99.89	Peptidase
9	NZ_CP086368_CDS_LMF30_RS04990	1	2	3	6	100	Outer membrane protein (Porin)
12	NZ_CP086368_CDS_pal	2	2	2	6	99.67	Belongs to the ompA family
14	NZ_CP086368_CDS_LMF30_RS05390	2	1	3	6	100	Belongs to the ompA family
18	NZ_CP086368_CDS_LMF30_RS06000	1	2	3	6	100	Gram-negative porin
21	NZ_CP086368_CDS_LMF30_RS06190	2	1	3	6	100	1-acyl-2-lysophosphatidylserine acylhydrolase activity
24	NZ_CP086368_CDS_prn	2	2	2	6	2.83	Outer membrane autotransporter
32	NZ_CP086368_CDS_LMF30_RS08740	1	2	3	6	100	Flagellar hook-associated protein
33	NZ_CP086368_CDS_flgG	2	2	2	6	100	Flagellar basal body rod
43	NZ_CP086368_CDS_LMF30_RS09730	2	2	2	6	100	Fimbrial protein
64	NZ_CP086368_CDS_LMF30_RS14800	2	2	2	6	100	endonuclease I
66	NZ_CP086368_CDS_LMF30_RS16280	2	2	2	6	99.78	Gram-negative porin
71	NZ_CP086368_CDS_LMF30_RS17550	2	2	2	6	100	TonB-dependent receptor
72	NZ_CP086368_CDS_LMF30_RS18280	1	2	3	6	100	N/D
73	NZ_CP086368_CDS_LMF30_RS18775	2	1	3	6	100	Copper resistance
6	NZ_CP086368_CDS_LMF30_RS03215	3	1	1	5	100	Outer membrane protein beta-barrel domain
19	NZ_CP086368_CDS_LMF30_RS06080	1	1	3	5	100	Receptor
20	NZ_CP086368_CDS_LMF30_RS06085	1	2	2	5	100	Receptor
26	NZ_CP086368_CDS_LMF30_RS07530	1	1	3	5	99.89	TonB-dependent siderophore receptor
27	NZ_CP086368_CDS_LMF30_RS07790	1	1	3	5	100	NlpE N-terminal domain
30	NZ_CP086368_CDS_flgB	2	2	1	5	100	Flagellar basal body rod
31	NZ_CP086368_CDS_LMF30_RS08735	1	2	2	5	100	Required for flagellar hook formation. May act as a scaffolding protein
36	NZ_CP086368_CDS_flgL	1	2	2	5	100	Bacterial-type flagellum-dependent cell motility
38	NZ_CP086368_CDS_fliL	1	1	3	5	100	Controls the rotational direction of flagella during chemotaxis
42	NZ_CP086368_CDS_LMF30_RS09700	1	2	2	5	100	Iron ion transport
46	NZ_CP086368_CDS_phg	1	2	2	5	100	Outer membrane autotransporter barrel domain
49	NZ_CP086368_CDS_LMF30_RS12200	1	2	2	5	100	Pilus formation protein N terminal region
50	NZ_CP086368_CDS_LMF30_RS12370	1	1	3	5	99.89	Outer membrane receptor proteins, mostly Fe transport
53	NZ_CP086368_CDS_LMF30_RS12780	1	1	3	5	100	Fimbrial protein
57	NZ_CP086368_CDS_bscC	1	2	2	5	100	Protein transport across the cell outer membrane
58	NZ_CP086368_CDS_bscJ	1	1	3	5	100	(LipO) protein
61	NZ_CP086368_CDS_LMF30_RS13630	1	1	3	5	100	Phospholipase C
63	NZ_CP086368_CDS_LMF30_RS14600	1	2	2	5	100	Bacterial type II and III secretion system protein
68	NZ_CP086368_CDS_LMF30_RS16745	1	2	2	5	100	TonB-dependent receptor
75	NZ_CP086368_CDS_bopC	2	1	2	5	100	Not Available
76	NZ_CP086368_CDS_fliF	1	2	2	5	99.23	Bacterial-type flagellum-dependent cell motility
1	fimB	1	1	2	4	99.67	Pilus organization
2	NZ_CP086368_CDS_LMF30_RS00840	1	2	1	4	100	TonB-dependent receptor
3	NZ_CP086368_CDS_LMF30_RS01660	2	1	1	4	99.89	Membrane organization
4	NZ_CP086368_CDS_LMF30_RS02925	2	1	1	4	100	Outer membrane efflux protein
5	NZ_CP086368_CDS_ptxA	1	2	1	4	100	NAD+ ADP-ribosyltransferase activity
7	NZ_CP086368_CDS_LMF30_RS03675	1	1	2	4	7.86	Outer membrane protein beta-barrel domain
10	NZ_CP086368_CDS_LMF30_RS05180	1	1	2	4	100	Phage-related minor tail protein
13	NZ_CP086368_CDS_LMF30_RS05365	1	1	2	4	100	Lipopolysaccharide transport
15	NZ_CP086368_CDS_LMF30_RS05475	1	1	2	4	100	Outer membrane receptor
16	NZ_CP086368_CDS_cyaE	1	1	2	4	99.67	Outer membrane efflux protein
17	NZ_CP086368_CDS_LMF30_RS05675	1	1	2	4	100	Autotransporter beta-domain
22	NZ_CP086368_CDS_LMF30_RS06735	1	1	2	4	100	RND efflux system, outer membrane lipoprotein
34	NZ_CP086368_CDS_LMF30_RS08755	1	2	1	4	99.67	Assembles around the rod to form the L-ring and probably protects the motor basal body from shearing forces during rotation
35	NZ_CP086368_CDS_LMF30_RS08760	1	1	2	4	100	Bacterial-type flagellum-dependent cell motility
37	NZ_CP086368_CDS_fliM	1	1	2	4	100	FliM is one of three proteins (FliG, FliN, FliM) that forms the rotor-mounted switch complex (C ring), located at the base of the basal body. This complex interacts with the CheY and CheZ chemotaxis proteins, in addition to contacting components of the motor that determine the direction of flagellar rotation
40	NZ_CP086368_CDS_fliE	1	1	2	4	100	Flagellar hook-basal body complex protein FliE
41	NZ_CP086368_CDS_fliD	2	1	1	4	100	N/D
48	NZ_CP086368_CDS_LMF30_RS12100	1	1	2	4	100	TonB-dependent receptor
51	NZ_CP086368_CDS_pgaA	1	1	2	4	7.86	Poly-beta-1,6 N-acetyl-D-glucosamine export porin PgaA
52	NZ_CP086368_CDS_fhaC	1	1	2	4	100	Hemolysin activation secretion protein
54	NZ_CP086368_CDS_LMF30_RS12785	1	1	2	4	99.89	N/D
62	NZ_CP086368_CDS_fauA	1	1	2	4	100	Receptor
69	NZ_CP086368_CDS_LMF30_RS16915	1	1	2	4	100	Peptidase
70	NZ_CP086368_CDS_LMF30_RS17210	1	1	2	4	99.89	Peptidase
74	NZ_CP086368_CDS_LMF30_RS18870	1	1	2	4	100	Receptor
59	NZ_CP086368_CDS_LMF30_RS13355	1	1	1	3	100	Outer membrane efflux protein
